# Supplementary material for: The Interaction of Deworming, Improved Sanitation, and Household Flooring with Soil-Transmitted Helminth Infection in Rural Bangladesh
Source: PLoS Negl Trop Dis. 2015 Dec 1;9(12):e0004256. doi: 10.1371/journal.pntd.0004256 (PMC4666415; doi:10.1371/journal.pntd.0004256)
Supplement: S1 Checklist — (PDF) [file pntd.0004256.s001.pdf]

**The interaction of deworming, improved sanitation, and household flooring with soil-transmitted helminth infection in rural Bangladesh**

**STROBE checklist for cross-sectional studies**

|                           | Item No | Recommendation                                                                                                                                                                       |                 |
|---------------------------|---------|--------------------------------------------------------------------------------------------------------------------------------------------------------------------------------------|-----------------|
| <b>Title and abstract</b> | 1       | (a) Indicate the study's design with a commonly used term in the title or the abstract                                                                                               | ✓               |
|                           |         | (b) Provide in the abstract an informative and balanced summary of what was done and what was found                                                                                  | ✓               |
| <b>Introduction</b>       |         |                                                                                                                                                                                      |                 |
| Background/rationale      | 2       | Explain the scientific background and rationale for the investigation being reported                                                                                                 | ✓ Lines 68-116  |
| Objectives                | 3       | State specific objectives, including any prespecified hypotheses                                                                                                                     | ✓ Lines 118-121 |
| <b>Methods</b>            |         |                                                                                                                                                                                      |                 |
| Study design              | 4       | Present key elements of study design early in the paper                                                                                                                              | ✓ Lines 126-172 |
| Setting                   | 5       | Describe the setting, locations, and relevant dates, including periods of recruitment, exposure, follow-up, and data collection                                                      | ✓ Lines 126-187 |
| Participants              | 6       | (a) <i>Cross-sectional study</i> —Give the eligibility criteria, and the sources and methods of selection of participants                                                            | ✓ Lines 126-187 |
| Variables                 | 7       | Clearly define all outcomes, exposures, predictors, potential confounders, and effect modifiers. Give diagnostic criteria, if applicable                                             | ✓ Lines 210-245 |
| Data sources/measurement  | 8*      | For each variable of interest, give sources of data and details of methods of assessment (measurement). Describe comparability of assessment methods if there is more than one group | ✓ Lines 125-194 |
| Bias                      | 9       | Describe any efforts to address potential sources of bias                                                                                                                            | ✓ Lines 237-245 |

|                        |     |                                                                                                                                                                                                              |                             |
|------------------------|-----|--------------------------------------------------------------------------------------------------------------------------------------------------------------------------------------------------------------|-----------------------------|
| Study size             | 10  | Explain how the study size was arrived at                                                                                                                                                                    | ✓ Lines 249-258             |
| Quantitative variables | 11  | Explain how quantitative variables were handled in the analyses. If applicable, describe which groupings were chosen and why                                                                                 | ✓ Lines 262-275             |
| Statistical methods    | 12  | (a) Describe all statistical methods, including those used to control for confounding                                                                                                                        | ✓ Lines 260-297             |
|                        |     | (b) Describe any methods used to examine subgroups and interactions                                                                                                                                          | ✓ Lines 277-297             |
|                        |     | (c) Explain how missing data were addressed                                                                                                                                                                  | ✓ Lines 274-275             |
|                        |     | (d) <i>Cross-sectional study</i> —If applicable, describe analytical methods taking account of sampling strategy                                                                                             | ✓ Lines 272-274             |
|                        |     | (e) Describe any sensitivity analyses                                                                                                                                                                        | ✓ Tables S1, S4             |
| <b>Results</b>         |     |                                                                                                                                                                                                              |                             |
| Participants           | 13* | (a) Report numbers of individuals at each stage of study—eg numbers potentially eligible, examined for eligibility, confirmed eligible, included in the study, completing follow-up, and analysed            | ✓ Figure 1                  |
|                        |     | (b) Give reasons for non-participation at each stage                                                                                                                                                         | ✓ Figure 1                  |
|                        |     | (c) Consider use of a flow diagram                                                                                                                                                                           | ✓ Figure 1                  |
| Descriptive data       | 14* | (a) Give characteristics of study participants (eg demographic, clinical, social) and information on exposures and potential confounders                                                                     | ✓ Table 1 and lines 319-325 |
|                        |     | (b) Indicate number of participants with missing data for each variable of interest                                                                                                                          | ✓ Table S3                  |
| Outcome data           | 15* | <i>Cross-sectional study</i> —Report numbers of outcome events or summary measures                                                                                                                           | ✓ Table 1                   |
| Main results           | 16  | (a) Give unadjusted estimates and, if applicable, confounder-adjusted estimates and their precision (eg, 95% confidence interval). Make clear which confounders were adjusted for and why they were included | ✓ Table 2, Lines 237-245    |
|                        |     | (b) Report category boundaries when continuous variables were categorized                                                                                                                                    | ✓ Lines 211-213             |

|                          |    |                                                                                                                                                               |                                 |
|--------------------------|----|---------------------------------------------------------------------------------------------------------------------------------------------------------------|---------------------------------|
|                          |    | (c) If relevant, consider translating estimates of relative risk into absolute risk for a meaningful time period                                              | Not relevant                    |
| Other analyses           | 17 | Report other analyses done—eg analyses of subgroups and interactions, and sensitivity analyses                                                                | ✓ Line 225, 362                 |
| <b>Discussion</b>        |    |                                                                                                                                                               |                                 |
| Key results              | 18 | Summarise key results with reference to study objectives                                                                                                      | ✓ Line 440-464                  |
| Limitations              | 19 | Discuss limitations of the study, taking into account sources of potential bias or imprecision.<br>Discuss both direction and magnitude of any potential bias | ✓ Line 556-594                  |
| Generalisability         | 21 | Discuss the generalisability (external validity) of the study results                                                                                         | ✓ Line 598-602                  |
| <b>Other information</b> |    |                                                                                                                                                               |                                 |
| Funding                  |    | Give the source of funding and the role of the funders for the present study and, if applicable, for the original study on which the present article is based | ✓ Provided to PLOS NTDs editors |
